# Supplementary material
Source: PubMed Central journal article supplement (PMC6322883)
Supplement: supp_RA118.002896_136384_3_supp_231213_phtqyr.pdf [file supp_RA118.002896_136384_3_supp_231213_phtqyr.pdf]

NFAT5 up-regulates expression of the kidney-specific ubiquitin ligase gene *Rnf183* under hypertonic conditions in inner-medullary collecting duct cells

**Yujiro Maeoka<sup>‡§</sup>, Yan Wu<sup>‡</sup>, Takumi Okamoto<sup>‡</sup>, Soshi Kanemoto<sup>‡¶</sup>, Xiao Peng Guo<sup>‡</sup>, Atsushi Saito<sup>¶</sup>,  
Rie Asada<sup>‡\*\*</sup>, Koji Matsuhisa<sup>¶</sup>, Takao Masaki<sup>§</sup>, Kazunori Imaizumi<sup>‡1</sup>, and Masayuki Kaneko<sup>‡2</sup>**

### **Supporting Information**

1. Table S1
2. Figures S1–S6

**Table S1. Putative transcription factor binding sites in the *RNF183* enhancer region.**

| <i>Mus musculus</i>      |               |                |              |              |          |                         | <i>Rattus norvegicus</i> |               |                |              |              |          |                         |
|--------------------------|---------------|----------------|--------------|--------------|----------|-------------------------|--------------------------|---------------|----------------|--------------|--------------|----------|-------------------------|
| Transcription factor     | JASPAR Score  | Relative Score | Start        | End          | Strand   | Predicted site sequence | Transcription factor     | JASPAR Score  | Relative Score | Start        | End          | Strand   | Predicted site sequence |
| STAT5                    | 15.281        | 98.1%          | -3466        | -3456        | 1        | CTTTCCAGAA              | STAT5                    | 14.146        | 96.7%          | -1978        | -1968        | 1        | CCTTCCCAGAA             |
| STAT1                    | 17.040        | 99.3%          | -3465        | -3455        | -1       | TTTCTGGGAAA             | Atoh1                    | 12.065        | 97.0%          | -1972        | -1965        | 1        | CAGAAGGC                |
| STAT3                    | 16.483        | 99.7%          | -3465        | -3455        | -1       | TTTCTGGGAAA             | NFIC <sup>a</sup>        | 8.520         | 96.1%          | -1935        | -1930        | 1        | TTGGCT                  |
| SP1                      | 13.428        | 95.0%          | -3438        | -3428        | 1        | CCCCGCCCG               | ZNF354C <sup>a</sup>     | 8.723         | 99.2%          | -1926        | -1921        | 1        | CTCCAC                  |
| KLF5                     | 13.577        | 97.6%          | -3438        | -3429        | 1        | CCCCGCCCG               | NFE2L1-MafG <sup>a</sup> | 8.812         | 100.0%         | -1913        | -1908        | 1        | CATGAC                  |
| Mafb                     | 9.499         | 100.0%         | -3430        | -3423        | -1       | GCTGACGG                | <b>NFAT<sup>a</sup></b>  | <b>11.360</b> | <b>100.0%</b>  | <b>-1866</b> | <b>-1860</b> | <b>1</b> | <b>TTTTCCA</b>          |
| SP1                      | 13.428        | 95.0%          | -3423        | -3413        | 1        | CCCCGCCCG               | Atoh1 <sup>a</sup>       | 13.740        | 99.6%          | -1861        | -1854        | 1        | CAGCTGCG                |
| KLF5                     | 13.577        | 97.6%          | -3423        | -3414        | 1        | CCCCGCCCG               | MZF1 <sub>1-4</sub>      | 9.085         | 100.0%         | -1845        | -1840        | -1       | TGGGGA                  |
| NFIC <sup>a</sup>        | 8.520         | 96.1%          | -3407        | -3402        | 1        | TTGGCT                  | Prrx2 <sup>a</sup>       | 9.124         | 100.0%         | -1826        | -1822        | 1        | AATTA                   |
| ZNF354C <sup>a</sup>     | 8.723         | 99.2%          | -3398        | -3393        | 1        | CTCCAC                  | Prrx2                    | 9.124         | 100.0%         | -1823        | -1819        | -1       | AATTA                   |
| NFE2L1-MafG <sup>a</sup> | 8.072         | 96.8%          | -3385        | -3380        | 1        | TATGAC                  | HOXA5                    | 8.661         | 95.8%          | -1813        | -1806        | 1        | CTCAAAAT                |
| <b>NFAT<sup>a</sup></b>  | <b>11.360</b> | <b>100.0%</b>  | <b>-3338</b> | <b>-3332</b> | <b>1</b> | <b>TTTTCCA</b>          | MZF1 <sub>1-4</sub>      | 9.085         | 100.0%         | -1797        | -1792        | -1       | TGGGGA                  |
| Atoh1 <sup>a</sup>       | 13.740        | 99.6%          | -3333        | -3326        | 1        | CAGCTGCG                | GATA3                    | 13.321        | 97.9%          | -1769        | -1762        | 1        | AGATAAAA                |
| MZF1 <sub>1-4</sub>      | 8.252         | 96.2%          | -3317        | -3312        | -1       | GGGGGA                  | FOXO1                    | 11.362        | 96.1%          | -1751        | -1744        | -1       | GTAAACAG                |
| Lhx3                     | 16.202        | 96.3%          | -3303        | -3291        | -1       | AAATTAATTAGTT           | FOXO3                    | 12.142        | 100.0%         | -1750        | -1743        | -1       | TGTAACA                 |
| Nobox                    | 10.854        | 98.3%          | -3302        | -3295        | -1       | TAATTAGT                | SOX10                    | 8.910         | 100.0%         | -1745        | -1740        | -1       | CTTTGT                  |
| Pdx1                     | 9.570         | 100.0%         | -3301        | -3296        | 1        | CTAATT                  | NFE2L1-MafG              | 8.692         | 99.5%          | -1687        | -1682        | 1        | GATGAC                  |
| Prrx2                    | 9.124         | 100.0%         | -3300        | -3296        | -1       | AATTA                   | <i>Homo sapiens</i>      |               |                |              |              |          |                         |
| Prrx2 <sup>a</sup>       | 9.124         | 100.0%         | -3299        | -3295        | 1        | AATTA                   | Transcription factor     | JASPAR Score  | Relative Score | Start        | End          | Strand   | Predicted site sequence |
| Prrx2                    | 9.124         | 100.0%         | -3296        | -3292        | -1       | AATTA                   | NFIC <sup>a</sup>        | 8.520         | 96.1%          | -4322        | -4317        | 1        | TTGGCT                  |
| Stat6                    | 15.738        | 95.5%          | -3283        | -3269        | 1        | AAGTTCCTGAGAAGC         | ZNF354C <sup>a</sup>     | 8.723         | 99.2%          | -4313        | -4308        | 1        | CTCCAC                  |
| Klf1                     | 14.517        | 95.7%          | -3271        | -3261        | 1        | AGCCCCACCCT             | NFE2L1-MafG <sup>a</sup> | 8.812         | 100.0%         | -4300        | -4295        | 1        | CATGAC                  |
| KLF5                     | 14.984        | 99.4%          | -3270        | -3261        | 1        | GCCCCACCCT              | Hlf <sup>f</sup>         | 7.794         | 95.6%          | -4279        | -4270        | -1       | TACCTTAGAC              |
| Klf4                     | 15.246        | 99.6%          | -3270        | -3261        | -1       | AGGGTGGGGC              | <b>NFAT<sup>a</sup></b>  | <b>11.360</b> | <b>100.0%</b>  | <b>-4252</b> | <b>-4246</b> | <b>1</b> | <b>TTTTCCA</b>          |
| GATA3                    | 13.321        | 97.9%          | -3242        | -3235        | 1        | AGATAAAA                | Atoh1 <sup>a</sup>       | 14.033        | 100.0%         | -4247        | -4240        | -1       | CAGATGCG                |
| FOXO1                    | 11.362        | 96.1%          | -3223        | -3216        | -1       | GTAAACAG                | Pdx1                     | 9.570         | 100.0%         | -4208        | -4203        | -1       | CTAATT                  |
| FOXO3                    | 11.549        | 98.0%          | -3222        | -3215        | -1       | GGTAACA                 | Prrx2 <sup>a</sup>       | 9.124         | 100.0%         | -4208        | -4204        | 1        | AATTA                   |
| Mafb                     | 8.818         | 97.0%          | -3171        | -3164        | 1        | GCTGACTC                | NFAT                     | 11.360        | 100.0%         | -4151        | -4145        | -1       | TTTTCCA                 |
| NFE2L1-MafG              | 8.692         | 99.5%          | -3159        | -3154        | 1        | GATGAC                  | BRCA1                    | 7.447         | 95.7%          | -4136        | -4130        | -1       | CCAACAG                 |
|                          |               |                |              |              |          |                         | NFIC                     | 9.697         | 100.0%         | -4133        | -4128        | 1        | TTGGCA                  |
|                          |               |                |              |              |          |                         | HOXA5                    | 9.854         | 100.0%         | -4069        | -4062        | -1       | CACAAAT                 |
|                          |               |                |              |              |          |                         | Pdx1                     | 9.570         | 100.0%         | -4069        | -4064        | -1       | CTAATT                  |
|                          |               |                |              |              |          |                         | Prrx2                    | 9.124         | 100.0%         | -4069        | -4065        | 1        | AATTA                   |
|                          |               |                |              |              |          |                         | NFAT                     | 11.360        | 100.0%         | -4058        | -4052        | -1       | TTTTCCA                 |

Transcription factor-binding sites predicted using the JASPAR software are shown in the mammalian conserved region of *RNF183* genes (mouse, -3,466 to -3,136; rat, -1,978 to -1,664; human, -4,367 to -4,049). The potential binding sites with a >95% chance (relative score) of binding to any of the listed transcription factors. <sup>a</sup> Conserved binding sites among mouse, rat, and human. The conserved NFAT5 DNA binding site is indicated as *yellow background*.

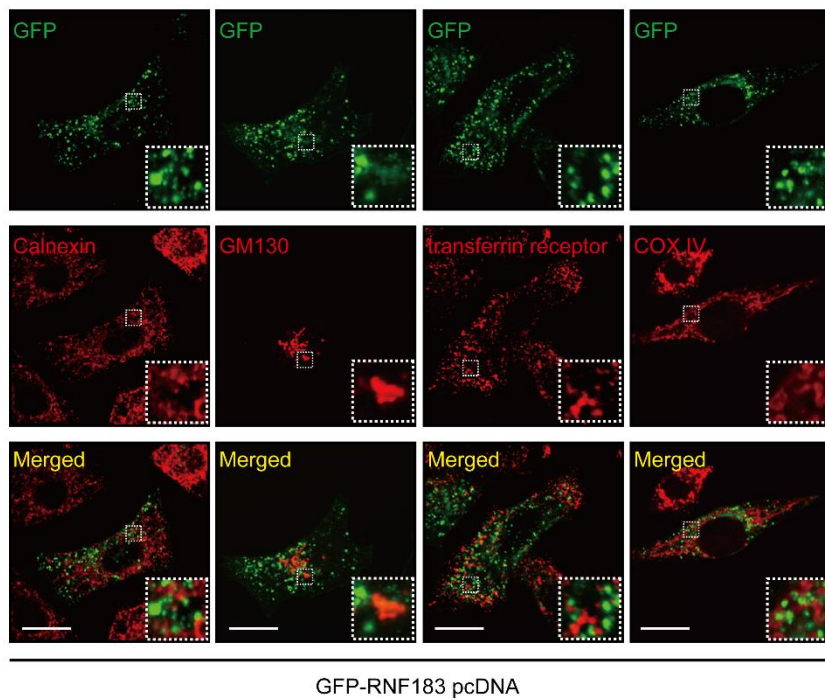

**Figure S1. Subcellular localization of RNF183.** The confocal images of immunofluorescence with GFP signals (*upper panels, green*) and various antibodies for organelle markers (Calnexin, GM130, transferrin receptor, and COX IV; *middle panels, red*) in HeLa cells transfected with GFP-RNF183. Bars, 10  $\mu\text{m}$ . All images shown are representative of at least three replicates in independent observations.

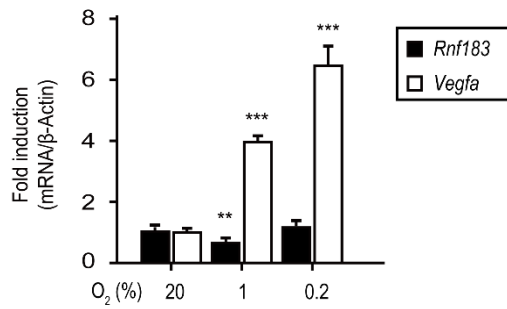

**Figure S2. RNF183 expression is not up-regulated under hypoxia.** Effect of hypoxia on *Rnf183* expression. Mouse IMCD-3 cells were maintained in hypoxia (0.1% or 0.3% O<sub>2</sub>) or normoxia (20% O<sub>2</sub>) chambers for 12 h at 37°C and analyzed by qRT-PCR analysis. *Vegfa* was used as a hypoxia-induced positive control. Expression levels were compared with those in normoxia ( $n = 6$ ). Data were analyzed by one-way ANOVA, followed by the *post hoc* tests using *t* tests with Bonferroni correction. Values represent mean  $\pm$  SD. \*\* $P < 0.01$ , \*\*\* $P < 0.001$  (versus normoxic control).

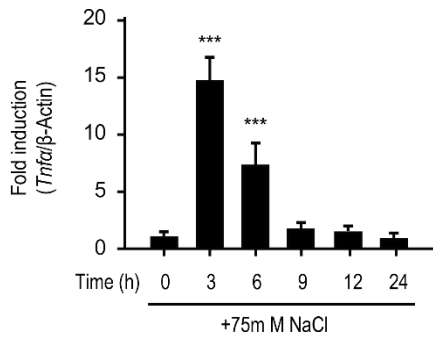

**Figure S3. *Tnfa* mRNA peaked after 3h of hypertonic stimulation.** Time-course analysis of *Tnfa* mRNA in response to hypertonic stress. Mouse IMCD-3 cells were treated with 75 mM NaCl-supplementation for indicated time and analyzed by qRT-PCR analysis. Expression levels were compared with those in isotonic control ( $n = 6$ ). Data were analyzed by one-way ANOVA followed by the *post hoc* tests using *t* tests with Bonferroni correction. Values represent mean  $\pm$  S.D. \*\*\*  $P < 0.001$  (versus isotonic control).

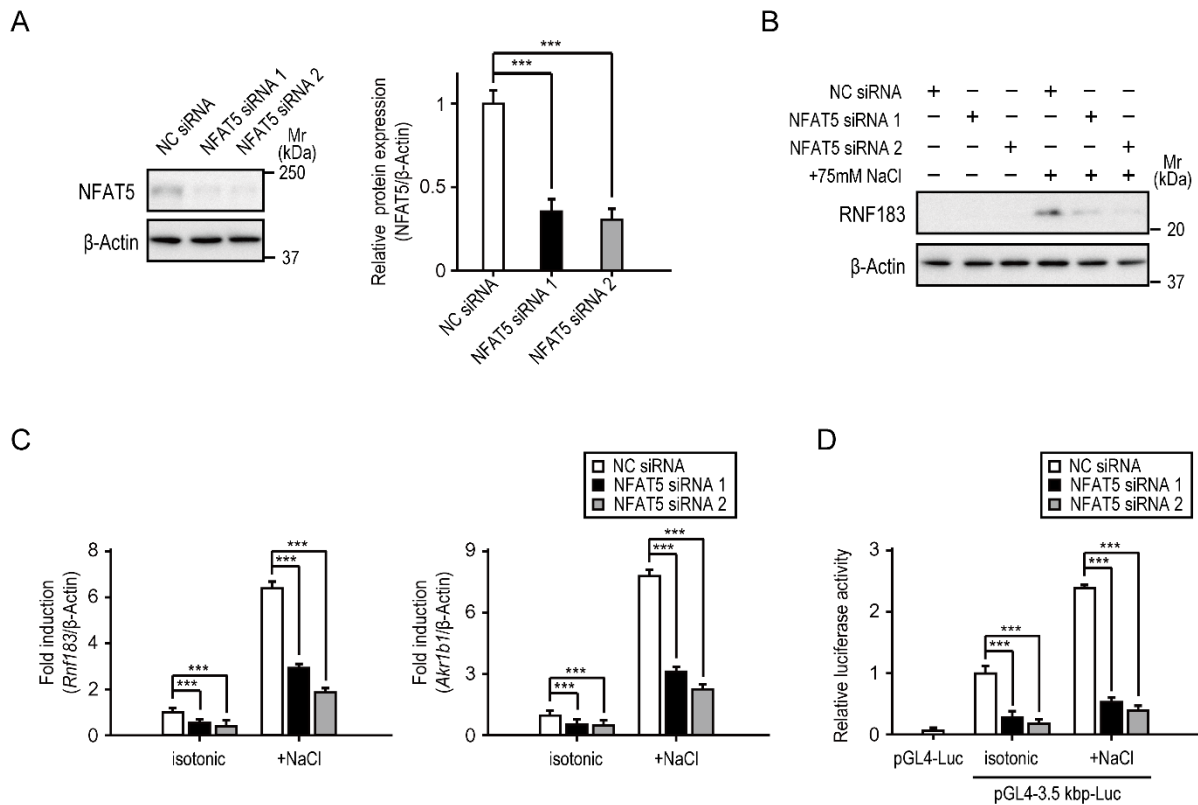

**Figure S4. NFAT5 knockdown attenuates hypertonicity-induced RNF183 expression.** **A.** Inhibition of NFAT5 expression using siRNA 2-mediated knockdown. Mouse IMCD-3 cells transfected with NFAT5 siRNA 1, NFAT5 siRNA 2, or negative control (NC) siRNA were analyzed by western blotting. The quantification of NFAT5 is summarized in the accompanying bar graph ( $n = 3$ ). **B and C.** Effects of NFAT5 siRNA 2-mediated knockdown on **(B)** expression of RNF183 protein and **(C)** expression of *Rnf183* (left) and *Akr1b1* (right) mRNA ( $n = 4$ ). mIMCD-3 cells transfected with NFAT5 siRNA 1, NFAT5 siRNA 2, or NC siRNA were treated with isotonic or 75 mM NaCl -supplemented medium for 12 h and analyzed using **(B)** western blot and **(C)** qRT-PCR. **D.** Effect of NFAT5 siRNA 2-mediated knockdown on hypertonicity-induced promoter activities. Cells co-transfected with 3.5 kbp-Luc and siRNA (NFAT5 1, NFAT5 2 or NC) were treated with isotonic or 75 mM NaCl- or sucrose-supplemented medium for 24 h ( $n = 4$ ). Data were analyzed by one-way ANOVA, followed by the *post hoc* tests using *t* tests with Bonferroni correction. Values represent mean  $\pm$  SD. \*\*\* $P < 0.001$  (versus NC).

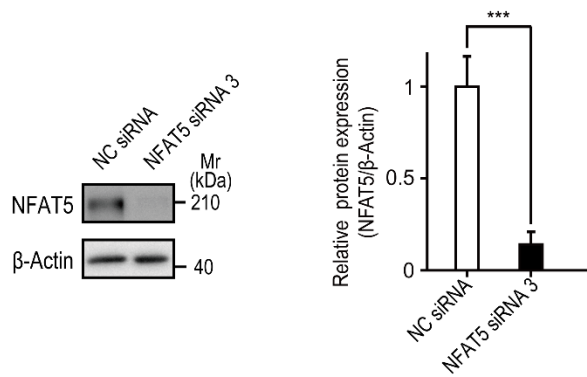

**Figure S5. Inhibition of NFAT5 expression using NFAT5 siRNA 3-mediated knockdown.** Mouse IMCD-3 cells transfected with NFAT5 siRNA 3 or negative control (NC) siRNA were analyzed by western blotting. The quantification of NFAT5 is summarized in the accompanying bar graph ( $n = 3$ ). Data were analyzed by  $t$  test. Values represent mean  $\pm$  SD. \*\*\* $P < 0.001$ .

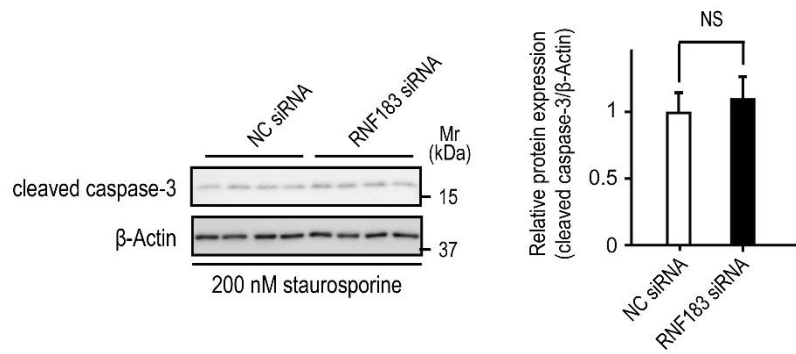

**Figure S6. RNF183 expression did not protect against staurosporine-induced apoptosis**

Cells transfected with the indicated siRNAs were treated with 200 nM staurosporine-supplemented medium for 12 h and analyzed using western blotting. The accompanying bar graph summarizes the quantification of relative amounts of cleaved caspase-3 ( $n = 4$ ). Values represent mean  $\pm$  SD. N.S.  $P > 0.05$  (versus NC).
